# Supplementary material for: Design of a randomized controlled trial of disclosing genomic risk of coronary heart disease: the Myocardial Infarction Genes (MI-GENES) study
Source: PubMed Central journal article supplement (PMC4536729; doi:10.1186/s12920-015-0122-0), 2015-08-15
Supplement: 12920_2015_122_MOESM1_ESM.pdf [file 12920_2015_122_MOESM1_ESM.pdf]

## SUPPLEMENTAL MATERIAL

**Supplementary Table 1. Genetic Loci Associated with Coronary Heart Disease Used in Genetic Risk Score Calculation**

| Gene                         | SNP        | CHR | Risk Allele | Risk Allele OR |
|------------------------------|------------|-----|-------------|----------------|
| <i>MIA3</i>                  | rs17465637 | 1   | C           | 1.14           |
| <i>PPAP2B</i>                | rs17114036 | 1   | A           | 1.11           |
| <i>IL6R</i>                  | rs4845625  | 1   | T           | 1.04           |
| <i>WDR12</i>                 | rs6725887  | 2   | C           | 1.12           |
| <i>ZEB2-AC074093.1</i>       | rs2252641  | 2   | G           | 1.04           |
| <i>VAMP5-VAMP8-GGCX</i>      | rs1561198  | 2   | A           | 1.05           |
| <i>MRAS</i>                  | rs9818870  | 3   | T           | 1.07           |
| <i>EDNRA</i>                 | rs1878406  | 4   | T           | 1.06           |
| <i>SLC22A4-SLC22A5</i>       | rs273909   | 5   | C           | 1.09           |
| <i>TCF21</i>                 | rs12190287 | 6   | C           | 1.07           |
| <i>PHACTR1</i>               | rs9369640  | 6   | A           | 1.09           |
| <i>KCNK5</i>                 | rs10947789 | 6   | T           | 1.06           |
| <i>PLG</i>                   | rs4252120  | 6   | T           | 1.06           |
| <i>ANKS1A</i>                | rs17609940 | 6   | G           | 1.07           |
| 7q22 <i>BCAP29</i>           | rs10953541 | 7   | C           | 1.08           |
| <i>HDAC9</i>                 | rs2023938  | 7   | G           | 1.07           |
| <i>CDKN2BAS1</i>             | rs1333049  | 9   | C           | 1.23           |
| <i>CXCL12</i>                | rs2047009  | 10  | C           | 1.05           |
| <i>KIAA1462</i>              | rs2505083  | 10  | C           | 1.06           |
| <i>PDGFD</i>                 | rs974819   | 11  | A           | 1.07           |
| <i>COL4A1-COL4A2</i>         | rs4773144  | 13  | G           | 1.07           |
| <i>COL4A1-COL4A2</i>         | †rs9515203 | 13  | T           | 1.08           |
| <i>FLT1</i>                  | rs9319428  | 13  | A           | 1.05           |
| <i>HHIPL1</i>                | rs2895811  | 14  | C           | 1.06           |
| <i>RAI1-PEMT-RASD1</i>       | rs12936587 | 17  | G           | 1.06           |
| <i>SMG6</i>                  | rs216172   | 17  | C           | 1.07           |
| <i>UBE2Z</i>                 | rs46522    | 17  | T           | 1.06           |
| Gene desert ( <i>KCNE2</i> ) | rs9982601  | 21  | T           | 1.13           |

CHD: coronary artery disease; CHR: Chromosome; OR: odds ratio
